# Supplementary material for: Otx2-Genetically Modified Retinal Pigment Epithelial Cells Rescue Photoreceptors after Transplantation
Source: PubMed Central journal article supplement — Mol Ther. 2017 Sep 8;26(1):219–37. doi: 10.1016/j.ymthe.2017.09.007 (PMC5762984; doi:10.1016/j.ymthe.2017.09.007), 2017-09-08
Supplement: mmc1.pdf [file mmc1.pdf]

## **Supplemental Information**

### **Otx2-Genetically Modified Retinal Pigment**

### **Epithelial Cells Rescue Photoreceptors**

### **after Transplantation**

**Christo Kole, Laurence Klipfel, Ying Yang, Vanessa Ferracane, Frederic Blond, Sacha Reichman, Géraldine Millet-Puel, Emmanuelle Clérin, Najate Aït-Ali, Delphine Pagan, Hawa Camara, Marie-Noëlle Delyfer, Emeline F. Nandrot, Jose-Alain Sahel, Olivier Goureau, and Thierry Lévillard**

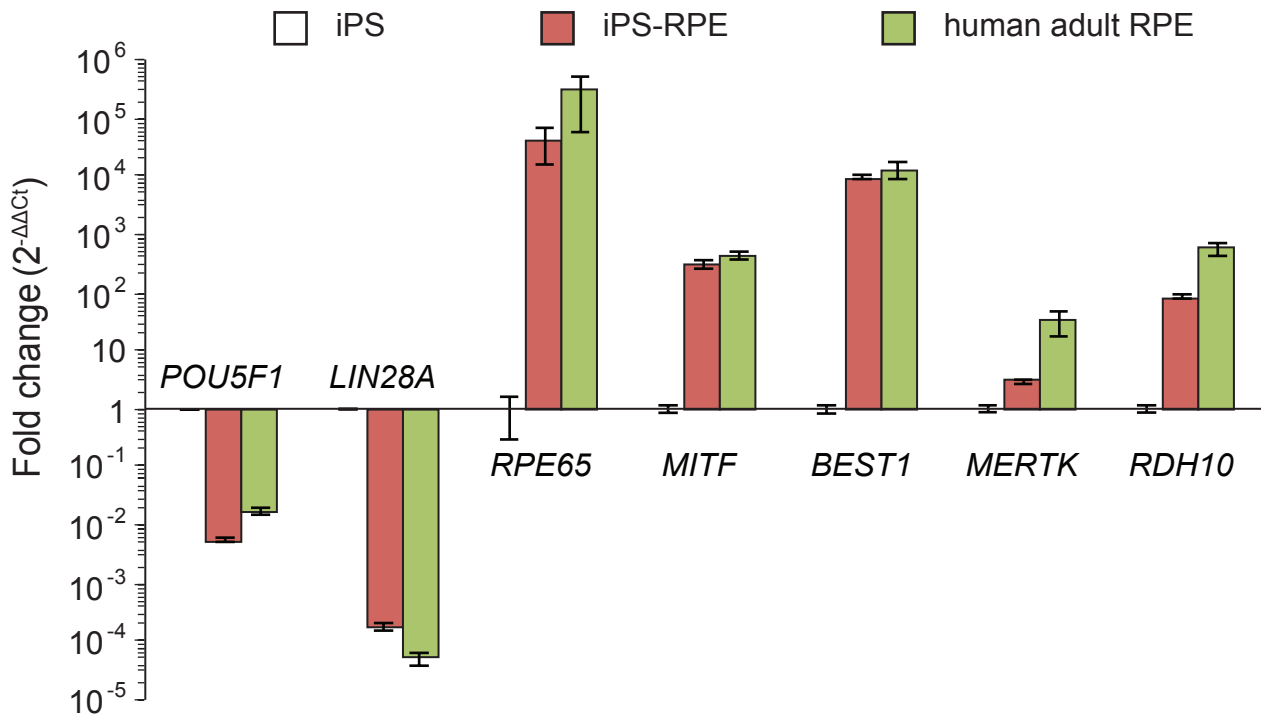

Figure S1 Fold change in expression by qRT-PCR of RPE specific markers in differentiated human iPS-derived RPE and human adult RPE cells as compared to undifferentiated human iPS cells. All data were normalized to 18S rRNA. Mean with SD.

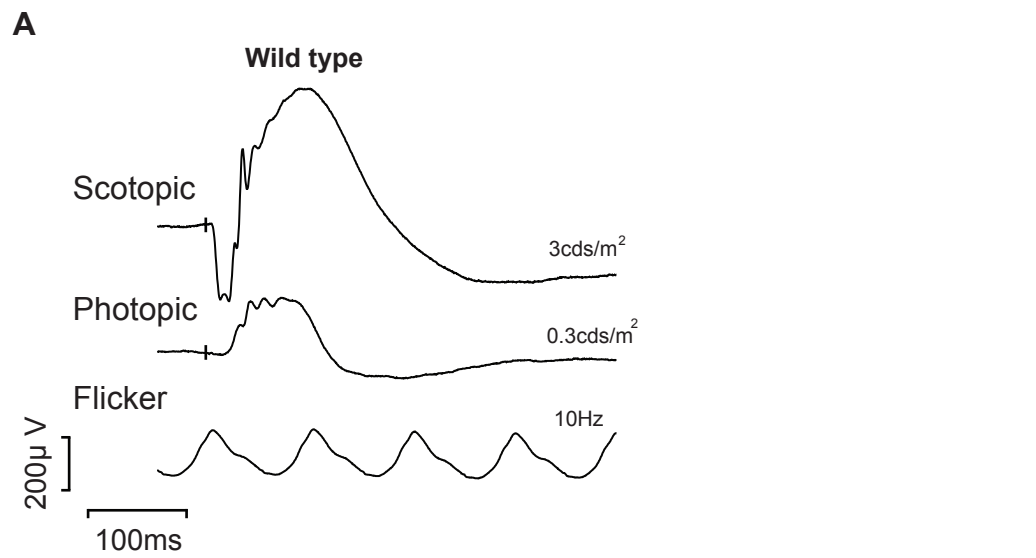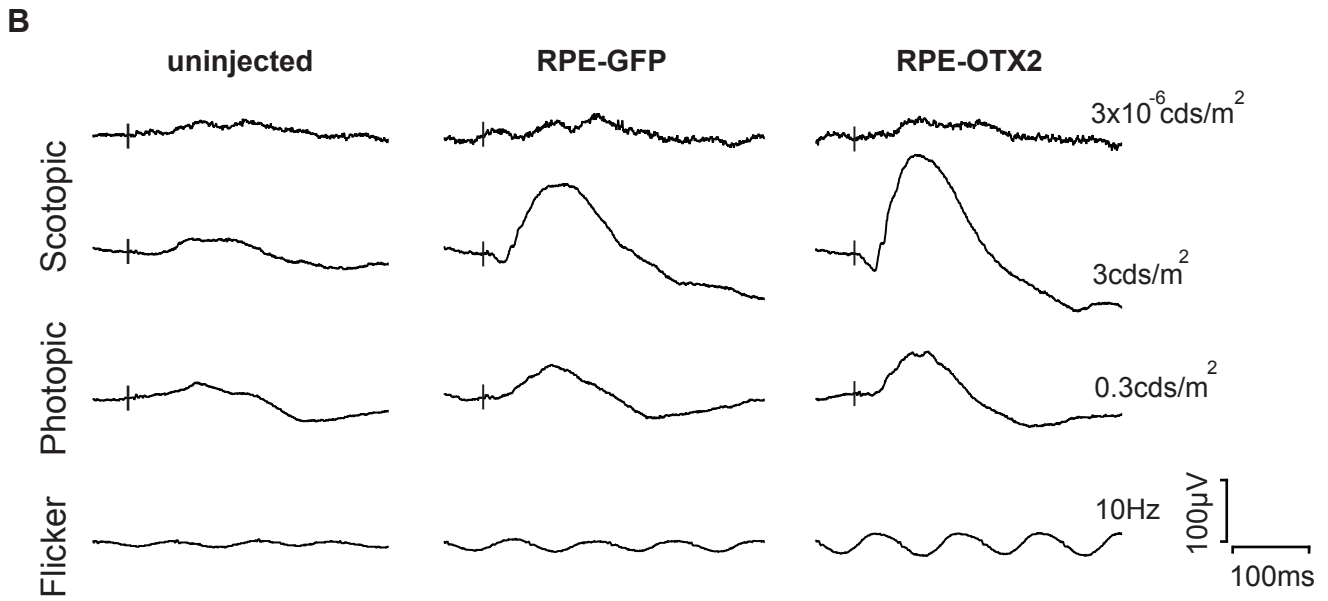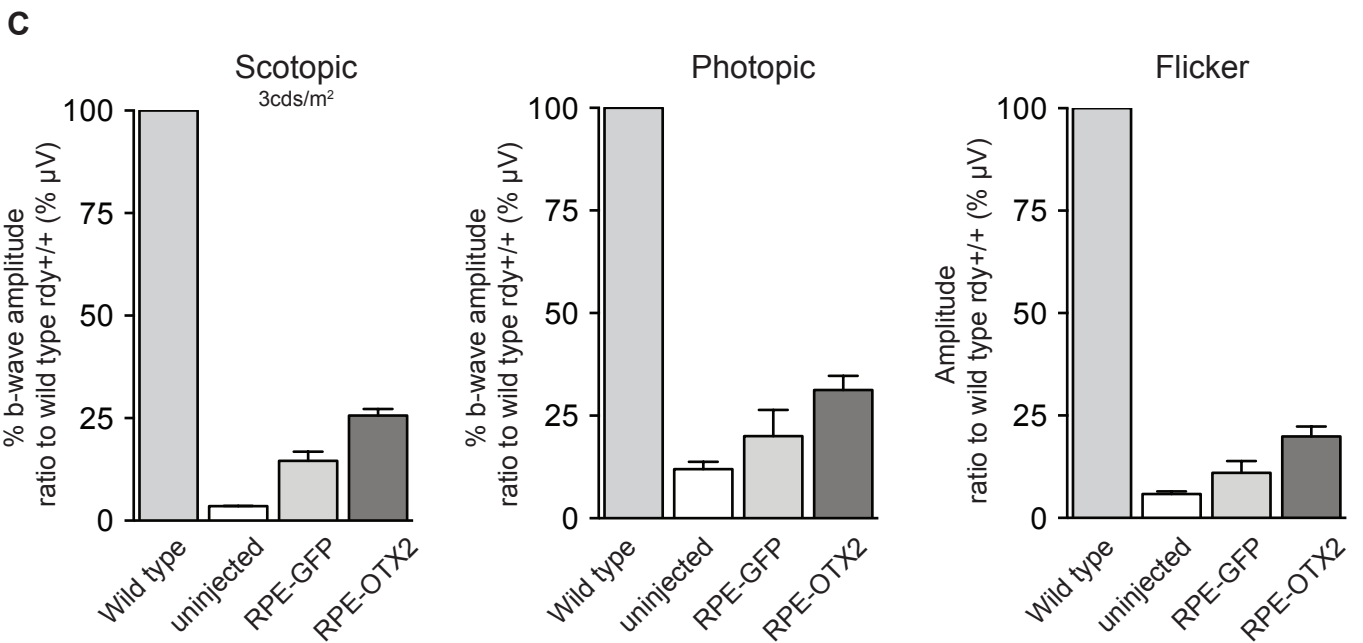

**Figure S2. ERG amplitude comparisons in the uninjected and transplanted RCS rat eyes. (A)** Characteristic ERG traces of wild type RCS rat. **(B)** Characteristic ERG amplitudes recorded at 42 post-injection days in dystrophic uninjected, RPE-GFP and RPE-OTX2 grafted animals. **(C)** Percentage of signal relative to wild type ERG recording comparison..

A

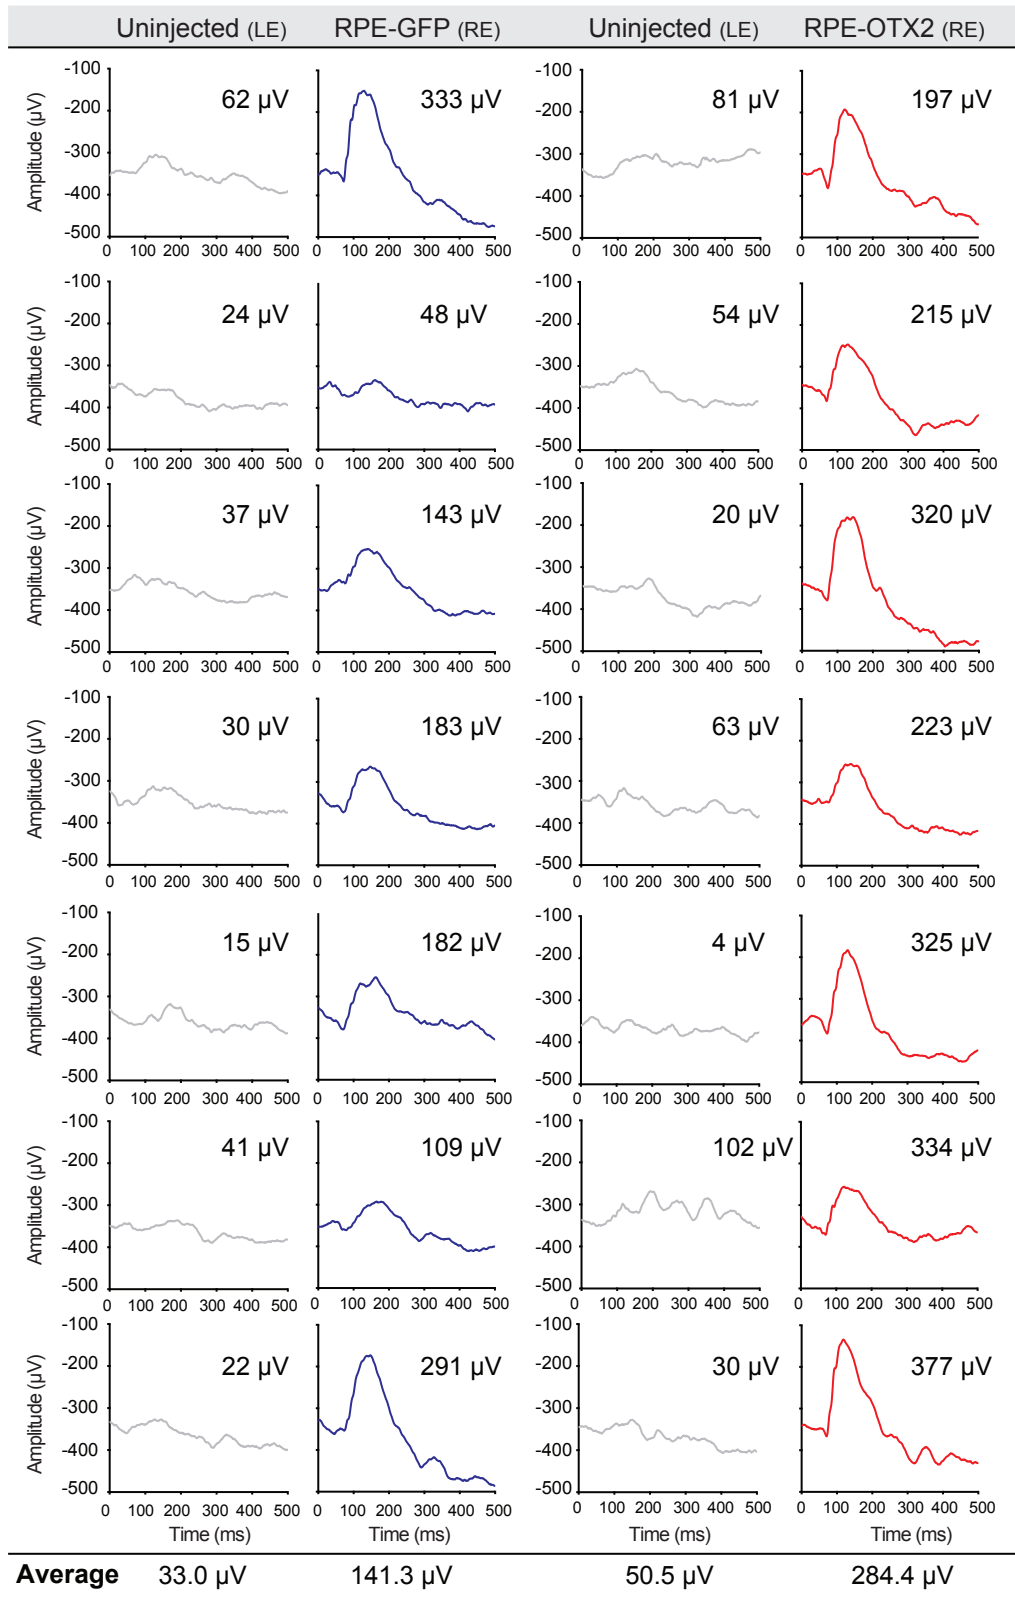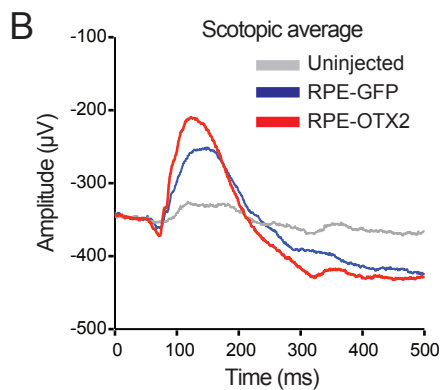

**Figure S3. Scotopic ERG recording of the transplanted RCS rats. (A)** Individual traces. **(B)** Averaged traces. LE: left eye and RE: right eye.

A

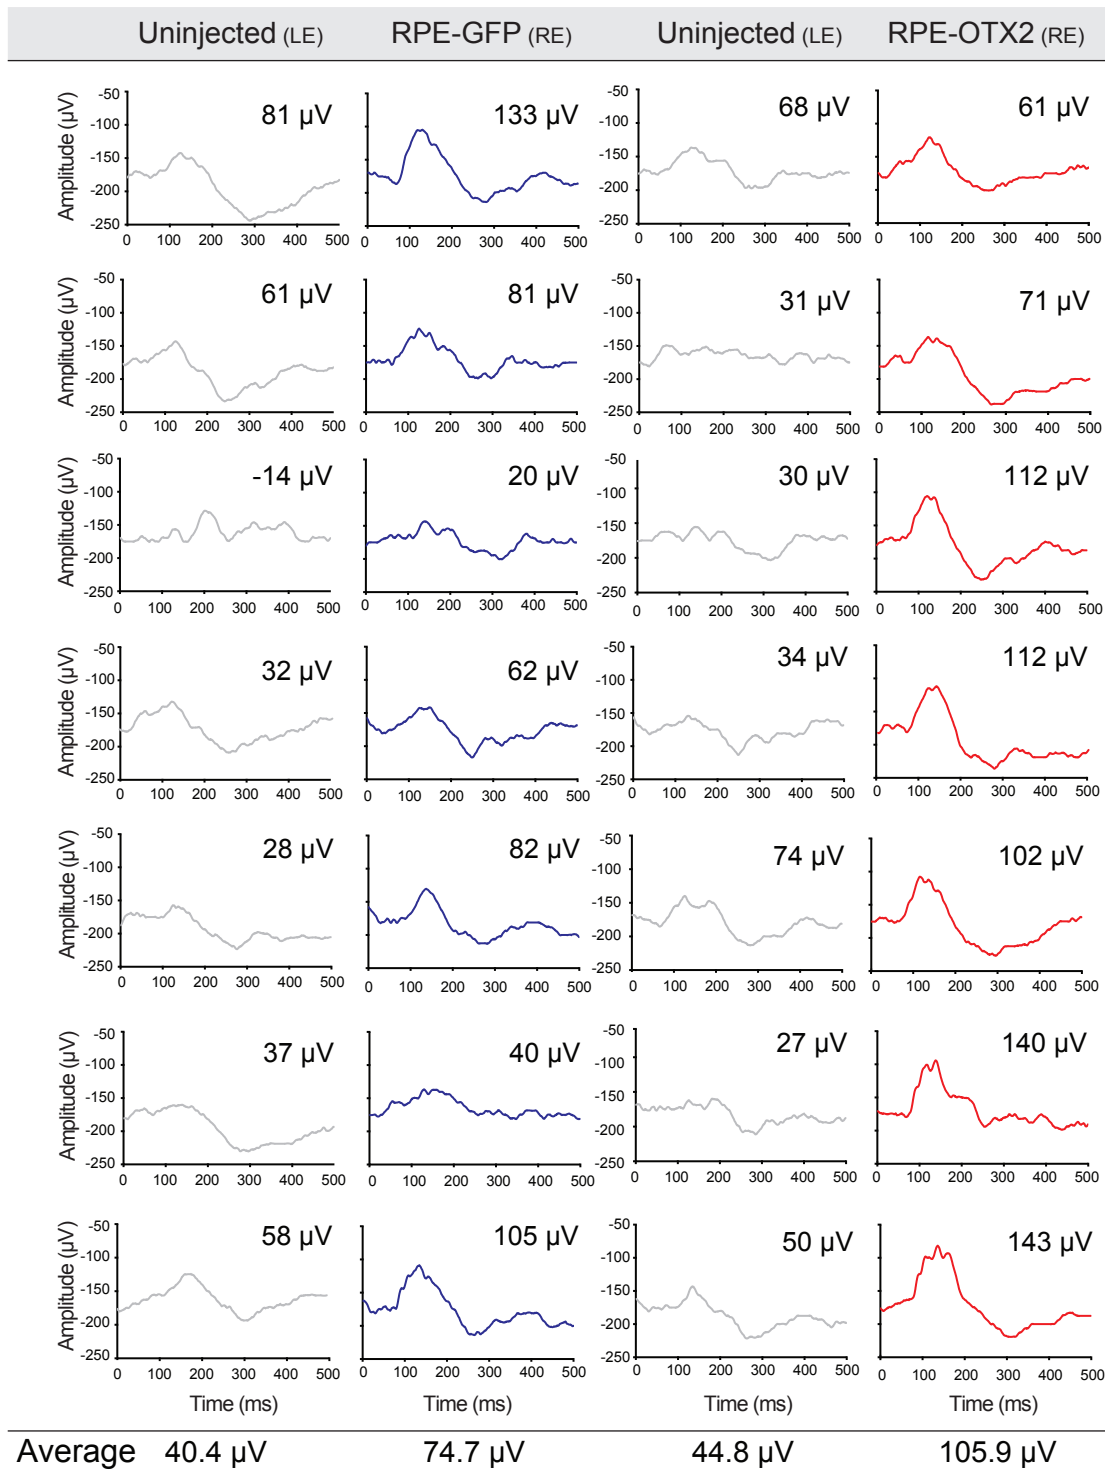

B

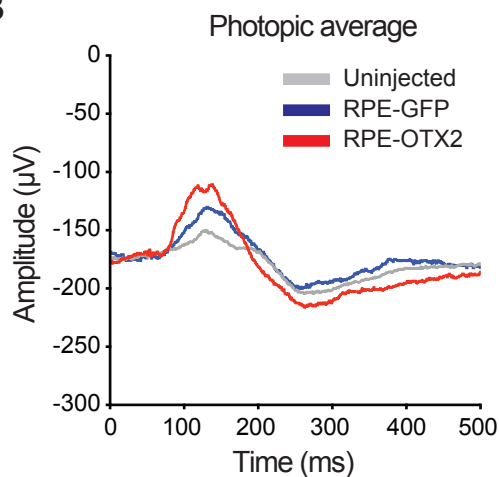

**Figure S4. Photopic ERG recording of the transplanted RCS rats. (A) Individual traces. (B) Averaged traces. LE: left eye and RE: right eye.**

**A**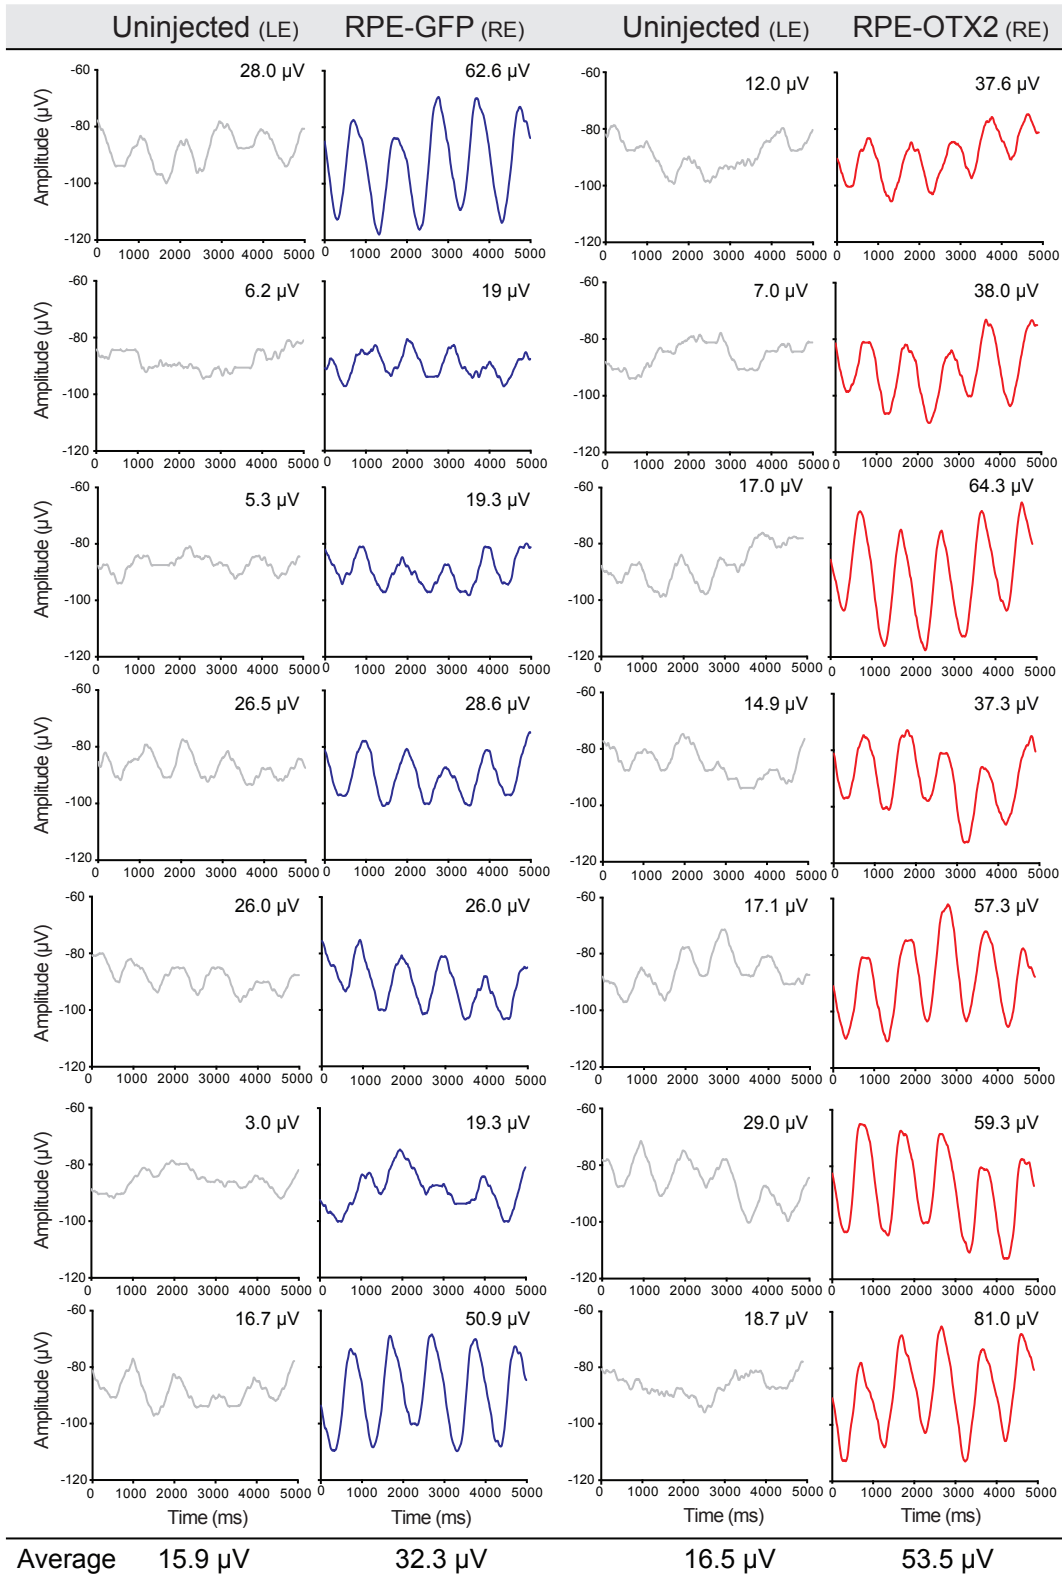**B**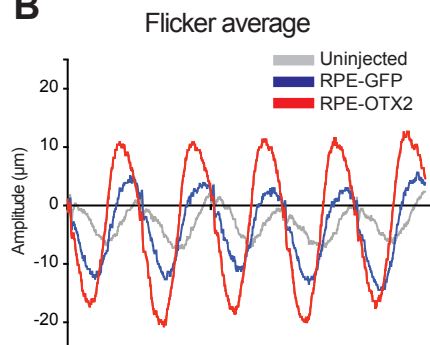

**Figure S5. Flicker ERG recording of the transplanted RCS rats. (A) Individual traces. (B) Averaged traces. LE: left eye and RE: right eye.**

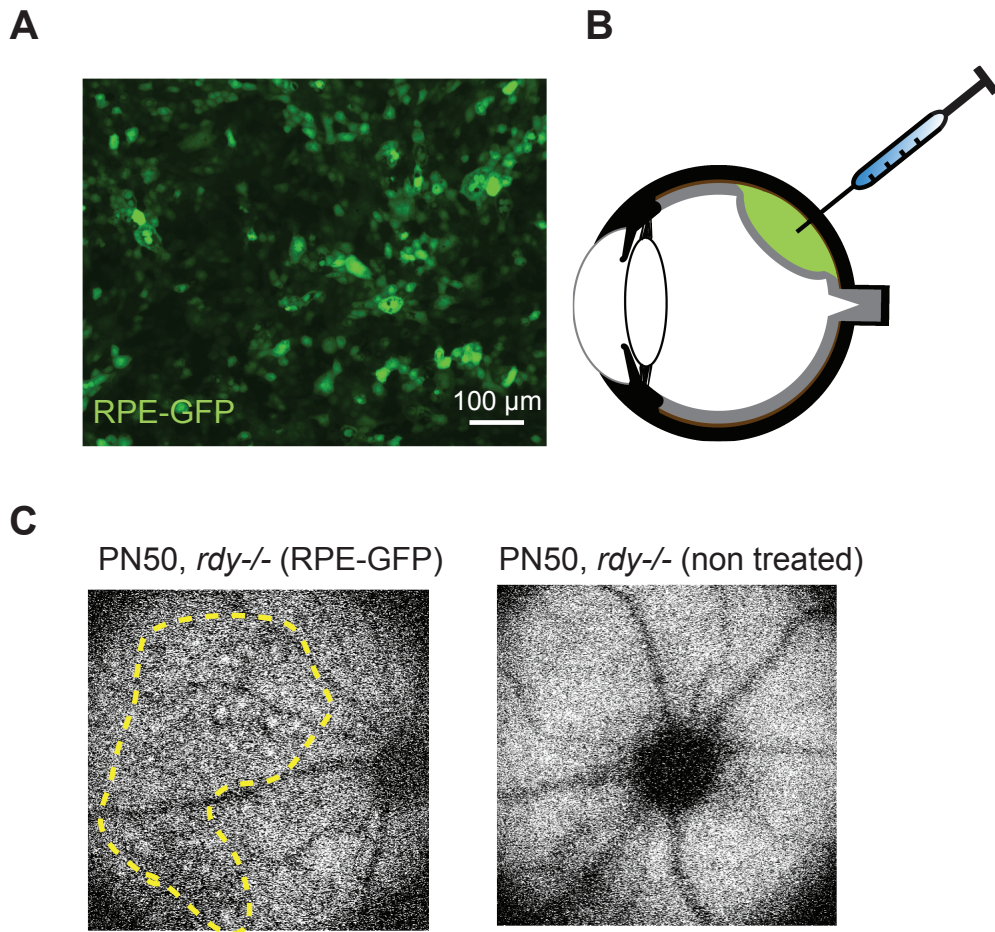

**Figure S6. Transplantation procedure.** (A) GFP fluorescence of the pig RPE cells transduced with AAV2.1-GFP prior to their transplantation. (B) Schematic representation of subretinal injection. (C) Representative fundus of the RPE-GFP graft validation in the eye of treated RCS rats and negative control (non-treated) using laser scanner ophthalmoscopy.

**Table S1 Primer sequence used for quantitative RT-PCR**

| Gene Name     | NCBI Accession No | Specie | PRIMERS (5' > 3')      |                        |
|---------------|-------------------|--------|------------------------|------------------------|
|               |                   |        | Forward                | Reverse                |
| <i>ACTA2</i>  | XM_005671254.1    | Pig    | GCCCTGGACTTTGAAAATGA   | GTCAGGCAGCTCGTAGCTCT   |
| <i>BDNF</i>   | NM_214259.2       | Pig    | CCTTTGGAGCCTCCTCTTCT   | CCTCATGGACATGTTTGACAG  |
| <i>BEST1</i>  | NM_001139443.1    | Human  | AAGACTGTGAGTTCTGGGGC   | ACTCCACAGTTTTCCTCCTCAC |
| <i>BEST1</i>  | XM_003353833.1    | Pig    | CCAAAGACCAGAGCCTTCAG   | GACAGATCGGCCAGGTTAAA   |
| <i>BMP4</i>   | NM_001101031.2    | Pig    | GGCTGGAATGACTGGATTGT   | AGTTGACCAGGGTCTGAACG   |
| <i>CACNB2</i> | XM_003482816.1    | Pig    | CATGAACAGAGAGCCAAGCA   | GGAGGTGTCGATTTTCTGGA   |
| <i>CRX</i>    | NM_000554.4       | Human  | GTGAGGAGGTGGCTCTGAAG   | CTGCTGTTTCTGCTGCTGTC   |
| <i>CRX</i>    | XM_003127265.1    | Pig    | CTGCCTCTGCTTTCTGCTCT   | GGATCCAGGCCACTGAAATA   |
| <i>CLDN19</i> | NM_001160084.1    | Pig    | CATGGTCCTCAGTGTGTGCG   | AGGGTGGCATACCATGAGAC   |
| <i>CNTF</i>   | XM_003122707.2    | Pig    | AACCTGGACTCTGTGGATGG   | ACGGTAAGCTCGGAGGTTCT   |
| <i>COL8A1</i> | XM_001926443.3    | Pig    | CCACCTCAAATTCCTCCTCA   | CCGGCTGAATTCCTTCATA    |
| <i>CRYAB</i>  | XM_003357294.1    | Pig    | CGAGGAACTCAAGGTCAAGG   | AGGACCCCATCAGATGACAG   |
| <i>CTSD</i>   | NM_001037721.1    | Pig    | ATCAAGGTCGAGAGGCAGAC   | TCTGCTGCATCAGGTTATCG   |
| <i>DCT</i>    | NM_001025227.1    | Pig    | ACAGCGAGAAACTGCCAAGT   | AAGGCATTCCGTAAGCTGAA   |
| <i>FADS1</i>  | NM_001113041.1    | Pig    | CTATGTGCGCATCTTCCTCA   | CTGTGTCACCCACACAAACC   |
| <i>GAPDH</i>  | NM_001256799.1    | Human  | TCCAAAATCAAGTGGGGCGA   | AAATGAGCCCCAGCCTTCTC   |
| <i>GAPDH</i>  | NM_001206359.1    | Pig    | ACCCAGAAGACTGTGGATGG   | AAGCAGGGATGATGTTCTGG   |
| <i>GPNUMB</i> | NM_001098584.1    | Pig    | GATTCATGATCCCAGCCACT   | TTGCACAGTGAGGTTGAAGC   |
| <i>ITGAV</i>  | NM_001083932.1    | Pig    | GTTCTGCTTAAAGGCGGATG   | GTCGAATTGCTCCTTTCTGC   |
| <i>ITGB5</i>  | NM_001246669.1    | Pig    | TGCAGACCAAGAGAGATTG    | GTTTTGGCAGGTCTGGTTGT   |
| <i>ITGB8</i>  | NM_001097424.1    | Pig    | GCCTGGGTGTTTTTCAGTTGT  | TTGAGCACACCATCCACATT   |
| <i>KCNJ13</i> | NM_001172416.1    | Human  | GTGCTTTTGTGGCGAAGATT   | GTGTTGGCCACTTGAAGAT    |
| <i>KCNJ13</i> | XM_001926506.3    | Pig    | TGTCCACTGGCTTGTCTTTG   | GGAGAAGGCAGCTGTGAAAC   |
| <i>KRT8</i>   | NM_001159615.1    | Pig    | GCATGAGTCTGGTTGGAGGT   | AGCAGGCTCTGGTTCACTGT   |
| <i>KRT18</i>  | XM_003126180.3    | Pig    | ACCTCAGGACCTCAGCAAGA   | GTGTCATCTCAGCAGCTCCA   |
| <i>LHX2</i>   | NM_001170519.1    | Pig    | AGTTCAGGCGCAACCTCTTA   | GCAGGGTGGGACTAGTCAAG   |
| <i>LRAT</i>   | NM_001244920.1    | Pig    | AGTGTCTTGTCTTCGGCAGT   | TTAGCCAGCCATCCATAAGC   |
| <i>LRP8</i>   | NM_001199891.1    | Pig    | AAGGAGTGCGAAGAGAACCA   | TCACAGGTGAAGTCGCTGTC   |
| <i>MERTK</i>  | NM_006343.2       | Human  | TATTCGCGATTGGAGACAGG   | GGGCAATATCCACCATGAAC   |
| <i>MERTK</i>  | XM_003124812.3    | Pig    | TCCTGGAAAAGTCTCCCTGAA  | CCGGAAAAGTGTGTGTTGATG  |
| <i>MITF</i>   | NM_000248.3       | Human  | CTCGAGCTCATGGACTTTCC   | TGATGATCCGATTCACCAA    |
| <i>MITF</i>   | NM_001038001.1    | Pig    | GCCAATCGGCATTTGTTACT   | GGATGAGGGAAAAGTCCATGA  |
| <i>MKI67</i>  | NM_001101827.1    | Pig    | CCTCGAAAATCCAGAAAAGCA  | GCCAAGGCCTCTTTCTTCTT   |
| <i>OTX2</i>   | NM_001270523.1    | Human  | CTTCTACTTTTGGGGGCATGGA | GCATTGGTACCCATGGGACTGA |



|                 |                |       | CTGTG                 | GTGTG                 |
|-----------------|----------------|-------|-----------------------|-----------------------|
| <i>OTX2</i>     | XM_003353491.1 | Pig   | AGAGGTCCTACCCCATGACC  | AGTAGGAAGTCGAGCCAGCA  |
| <i>PMEL</i>     | NM_001200053.1 | Human | CTGGATGGTACAGCCACCTT  | GGCACTTTCAATACCCTGGA  |
| <i>PMEL</i>     | XM_003481626.1 | Pig   | AACCCAATGCTACCTGCATC  | CCAGGCCTTCCAGACATAAA  |
| <i>RDH10</i>    | NM_172037.4    | Human | AAGGCTTTTCTTCCCTACGAT | GGCACAGTAATCCTCAACTC  |
| <i>RDH10</i>    | XM_001928082.3 | Pig   | AAGGCTTTTCTTCCCACCAT  | GGCGCAGTAATCCTCAACTC  |
| <i>RPE65</i>    | NM_000329.2    | Human | AAAGATCCCACCACTGCAAG  | GATGGCTTGAATCGGTCACT  |
| <i>RPE65</i>    | XM_003127931.2 | Pig   | AGGCTGACACAGGCAAGAAT  | AGCCAGATGGTCTCGTCACT  |
| <i>SERPINF1</i> | NM_001078662.1 | Pig   | GCTTACTTCAAGGGGCAGTG  | AGAATCCAAGCCGTAGCGTA  |
| <i>SLC16A3</i>  | XM_003357925.1 | Pig   | TACCTCACCCTGGGGTCAT   | TAGCGGTTGAGCATGATGAG  |
| <i>SLC16A8</i>  | NM_013356.2    | Human | CTGAGGCTGAAGGGGACTCT  | GCCTCGCCTCTATTTCTGGT  |
| <i>SLC16A8</i>  | XM_003126028.1 | Pig   | CAAGGCAGTGAGCGTTTTCT  | CCAGGCTGTGTCACTGTAGC  |
| <i>SLC16A12</i> | NM_213606.3    | Human | CCACACAACCTCCAGAGCAGA | GTCTGTGCCCATTTCTTTGGT |
| <i>SLC16A12</i> | XM_001928811.2 | Pig   | CTATGCACAGACAGCCTGGA  | TGACAACACTCCCAAGTGGA  |
| <i>SLC24A5</i>  | XM_003121523.1 | Pig   | TCTCCATCATCGGAGTTTCC  | CAAGGCCATGAGCATGTAGA  |
| <i>SLC39A12</i> | XM_003130728.1 | Pig   | ACGGAAAACCCCTCAACTCT  | TTGCCTTCCATACGTTCTCC  |
| <i>SMAD6</i>    | XM_003480446.1 | Pig   | CACCCCATCTTCGTCAACTC  | CGAAGTCGAACACCTTGATG  |
| <i>TRPM3</i>    | XM_001925032.3 | Pig   | AGGAGACCTTGTCCCAACT   | TGCAGGAGCTTTGGATTCTT  |
| <i>TYR</i>      | NM_000372.4    | Human | CCATGGATAAAGCTGCCAAT  | ATTGTGCATGCTGCTTTGAG  |
| <i>TYR</i>      | NM_001025212.1 | Pig   | ATGGAACCATGTCCCAGGTA  | CATTGGCTTCCGGATACACT  |
| <i>TYRP1</i>    | NM_001025226.1 | Pig   | TGTCTGATTCGTGCCAGAAG  | GTGAGGAGAGGCTGATTTGC  |
| <i>VIM</i>      | XM_005668106.1 | Pig   | ATGCTTCTTTGGCACGTCTT  | CTCATCAGGGCTCCAGCTAC  |
